# Supplementary material for: The nanosafety assessment of ENMs under a dermal exposure scenario: from key molecular events toin silicomodeling tools
Source: Royal Society of Chemistry journal article supplement (doi:10.1039/d3en00585b), 2023-11-27
Supplement: d3en00585b1.pdf [file d3en00585b1.pdf]

## Nanosafety Assessment of ENMs under Dermal Exposure Scenario: From Key Molecular Events to *In Silico* Modeling Tools

Wenjing Xie<sup>a,b</sup>, Ziyi Xiong<sup>a,b,c</sup>, Huimin Wang<sup>a,b</sup>, Xiaoyi Liu<sup>a,b</sup>, Hongyan Cui<sup>a,b</sup>,  
Qiongyi Huang<sup>a,b</sup> and Ying Tang<sup>a,b\*</sup>

<sup>a</sup>Beijing Key Laboratory of Plant Resources Research and Development, College of Chemistry and Materials Engineering, Beijing Technology and Business University, Beijing 100048, China

<sup>b</sup>Department of Cosmetics, College of Chemistry and Materials Engineering, Beijing Technology and Business University, Beijing 100048, China

<sup>c</sup>China Quality Mark Certification Group, Beijing 100048, China

\*Corresponding author: Y. Tang (tangying@th.btbu.edu.cn)

### Table of Abbreviations

| Acronym | Term                                        |
|---------|---------------------------------------------|
| AAS     | atomic absorption spectroscopy              |
| AD      | applicability domain                        |
| AFM     | atomic force microscope                     |
| AI      | artificial intelligence                     |
| ANN     | artificial neural network                   |
| AOPs    | adverse outcome pathways                    |
| BSA     | bovine serum albumin                        |
| CER     | long-chain ceramide                         |
| CG-MD   | coarse-grained molecular dynamics           |
| CHOL    | cholesterol                                 |
| CLSM    | confocal laser scanning microscope          |
| DFT     | density functional theory                   |
| DLS     | dynamic light scattering                    |
| DOPC    | 1,2-dioleoyl-sn-glycero-3-phosphocholine    |
| DPPC    | 1,2-dipalmitoyl-sn-glycero-3-phosphocholine |
| ECHA    | European Chemicals Agency                   |
| ENMs    | engineered nanomaterials                    |
| ETC     | electron transport chain                    |
| FFA     | free fatty acid                             |
| FRET    | fluorescence resonance energy transfer      |

---

|          |                                                                    |
|----------|--------------------------------------------------------------------|
| GSH      | glutathione                                                        |
| HAADF    | high-angle annular dark field                                      |
| HCA      | high content analysis                                              |
| HI       | human insulin                                                      |
| HRTEM    | high resolution transmission electron microscope                   |
| HTS      | high throughput screening                                          |
| IATA     | integrated approaches to testing and assessment                    |
| ICCR     | International Cooperation on Cosmetics Regulation                  |
| ICP-MS   | inductively coupled plasma-mass spectrometry                       |
| LC-MS    | liquid chromatography-mass spectrometry                            |
| LDH      | lactate dehydrogenase                                              |
| LMO      | leave-more-out                                                     |
| LOO      | leave-one-out                                                      |
| MD       | molecular dynamics                                                 |
| MeOx NPs | metal oxide nanoparticles                                          |
| ML       | machine learning                                                   |
| MLR      | multiple linear regression                                         |
| MTT      | 3- (4,5)-dimethylthiahiazio (-z-y1)-3,5-di- phenytetrazoliumromide |
| NGO      | graphene oxide                                                     |
| NPs      | nanoparticles                                                      |
| NPT      | isothermal-isobaric                                                |
| NTA      | nanoparticle tracking analysis                                     |
| NVT      | isothermal-isochoric                                               |
| OECD     | Organization for Economic Cooperation and Development              |
| PBPK     | physiologically-based pharmacokinetic                              |
| PCA      | principal component analysis                                       |
| PLS      | partial least-squares                                              |
| POPC     | 1-palmitoyl-2-oleoyl-sn-glycero-3-phosphocholine                   |
| q-RASAR  | quantitative read-across structure-activity relationship           |
| QSAR     | quantitative structure activity relationship                       |
| RA       | read-across                                                        |
| REO      | rare earth oxide                                                   |
| RF       | random forest                                                      |
| ROS      | reactive oxygen species                                            |
| SAED     | selected area electron diffraction                                 |
| SAR      | structure-activity relationship                                    |
| SCCS     | Scientific Committee on Consumer safety                            |
| SEM      | scanning electron microscope                                       |
| SMILE    | simplified molecular input-line entry                              |
| SOD      | superoxide dismutase                                               |
| SPRM     | surface plasmon resonance microscope                               |
| SVM      | support vector machine                                             |
| TEM      | transmission electron microscope                                   |

---

---

|        |                                                                                                  |
|--------|--------------------------------------------------------------------------------------------------|
| UV-Vis | ultraviolet–visible spectroscopy                                                                 |
| XRD    | X-ray Diffraction                                                                                |
| XTT    | 2,3- bis (2-methoxy-4-nitro-5-sulfophenyl)-5- [ (phenylamino)carbonyl] -2H-tetrazolium hydroxide |

---
